# Supplementary material for: Collective dynamics in a monolayer of squirmers confined to a boundary by gravity
Source: Royal Society of Chemistry journal article supplement (doi:10.1039/c9sm00889f), 2019-01-01
Supplement: c9sm00889f12.pdf [file c9sm00889f12.pdf]

## Supplemental material for “Collective Dynamics in a Monolayer of Squirmlers Confined to a Boundary by Gravity”

Jan-Timm Kuhr,<sup>\*</sup> Felix Rühle, and Holger Stark<sup>†</sup>

*Institut für Theoretische Physik, Technische Universität Berlin, Hardenbergstr. 36, 10623 Berlin, Germany*

### Video S1

Hydrodynamic Wigner fluid at  $\beta = 0$  and  $\phi = 0.26$ . Linear system size is  $L = 448$ . The Voronoi tessellation for the centers of the squirmlers is shown; hexagons are colored green, whereas pentagon and heptagon defects are colored yellow and red, respectively. A single squirmer is shown as blue circle.

### Video S2

Kissing at  $\beta = 2$  and  $\phi = 0.40$ . Linear system size is  $L = 112$ . A kissing trimer is indicated by the red circle.

### Video S3

Global cluster at  $\beta = 0$  and  $\phi = 0.79$ . Linear system size is  $L = 112$ . The Voronoi tessellation for the centers of the squirmlers is shown; hexagons are colored green, whereas pentagon and heptagon defects are colored yellow and red, respectively.

### Video S4

Fluctuating chains and trimers at  $\beta = -1$  and  $\phi = 0.40$ . Linear system size is  $L = 112$ .

### Video S5

Swarming emerges as the in-plane velocities align at  $\beta = -2$  and  $\phi = 0.49$ . Linear system size is  $L = 112$ .

### Video S6

Chaotic swarming at  $\beta = -5$  and  $\phi = 0.58$ . Linear system size is  $L = 112$ .

### Video S7

Overview of dynamic states at various densities  $\phi$  and squirmer parameter  $\beta$ . Linear system size is  $L = 112$  for all simulations.

### Video S8

Hydrodynamic Wigner fluid at  $\beta = 0$  and  $\phi = 0.26$ . Linear system size is  $L = 448$ . All squirmlers are shown as blue circles.

### Video S9

Hydrodynamic Wigner fluid at  $\beta = 2$  and  $\phi = 0.26$ . Linear system size is  $L = 448$ . The Voronoi tessellation for the centers of the squirmlers is shown; hexagons are colored green, whereas pentagon and heptagon defects are colored yellow and red, respectively. A single squirmer is shown as blue circle.

### Video S10

Fluctuating pairs at  $\beta = 1$  and  $\phi = 0.33$ . Linear system size is  $L = 112$ .

### Video S11

(Rotating) heptamers at  $\beta = -1$  and  $\phi = 0.68$ . Linear system size is  $L = 112$ .

---

<sup>\*</sup> jan-timm.kuhr@tu-berlin.de

<sup>†</sup> holger.stark@tu-berlin.de
